# Supplementary material
Source: MDPI journal article supplement (https://www.mdpi.com/2075-163X/12/7/909)
Supplement: s1 [file s1]

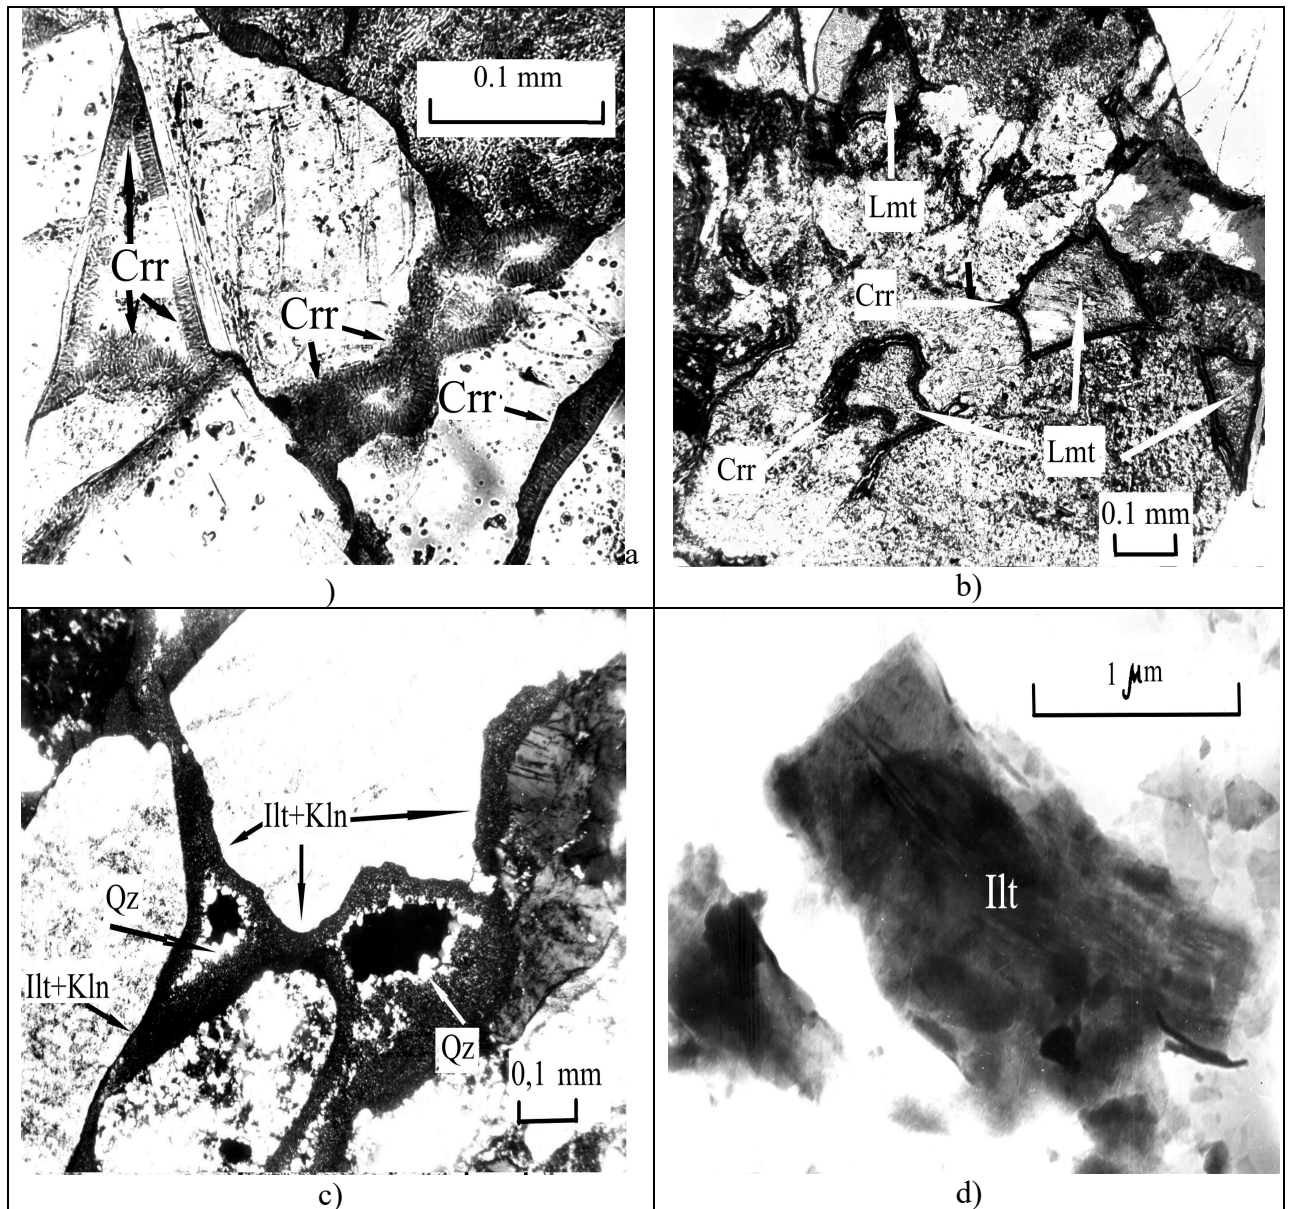

Figure S8: Images from polarizing optical and electron-microscope of the well-sorted Lower Cretaceous sandstones of the Yamato Upland.

a) photomicrograph of corrensite pore-filling cement (Crr). Open nicol. Station 1437-4, Southern Yamato Ridge; b) photomicrograph of pore-lining corrensite cement (Crr) with pore-filling laumontite cement (Lmt). Open nicol. Station 1430, Southern Yamato Ridge; c) photomicrograph of kaolinite cement. Pores are filled with kaolinite (Kln), illite (Illt), and quartz (Qz). Cross nicol. Station 1192, Northern Yamato Ridge; d) an electron-microscope photomicrograph. Station 1192-1, Northern Yamato Ridge. Isometric lamellar particle of illite (Illt) [25,26].
