# Supplementary material
Source: MDPI journal article supplement (https://www.mdpi.com/2075-163X/12/7/909)
Supplement: s1 [file s1]

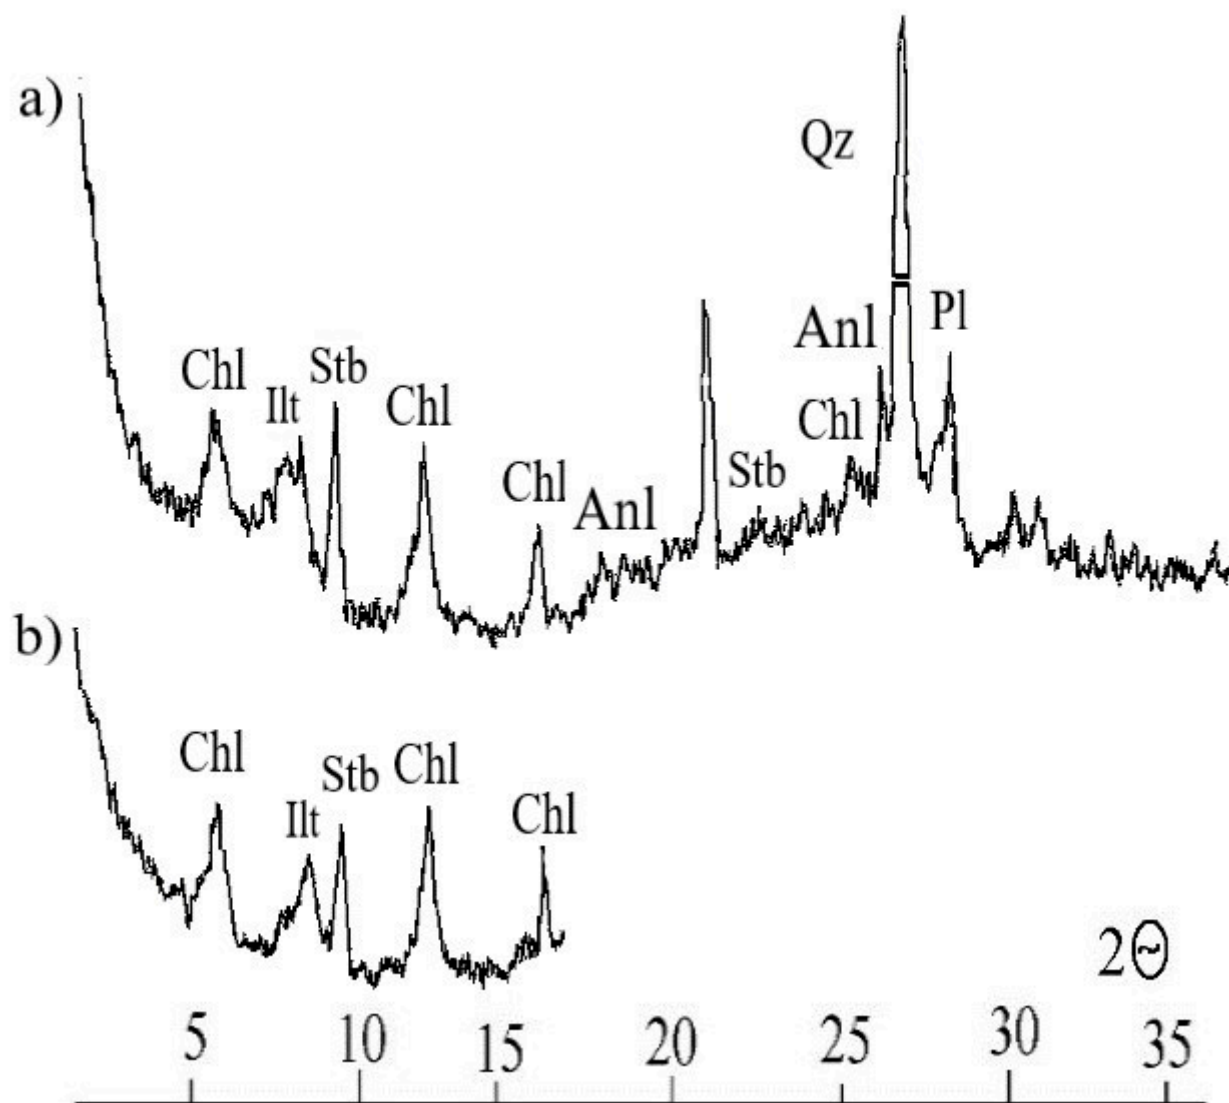

Figure S6: Oriented X-ray diffraction pattern of the Upper Cretaceous sedimentary rocks cement of Palana Section (Western Kamchatka, sample 87d).

Composed of Illite (Ilt), chlorite (Chl); stilbite (Stb), analcime (Anl), quartz (Qz), and plagioclase (Pl) [25,26]. Letters: a) air-dried; b) glycol-saturated.
