# Supplementary material
Source: MDPI journal article supplement (https://www.mdpi.com/2075-163X/12/7/909)
Supplement: s1 [file s1]

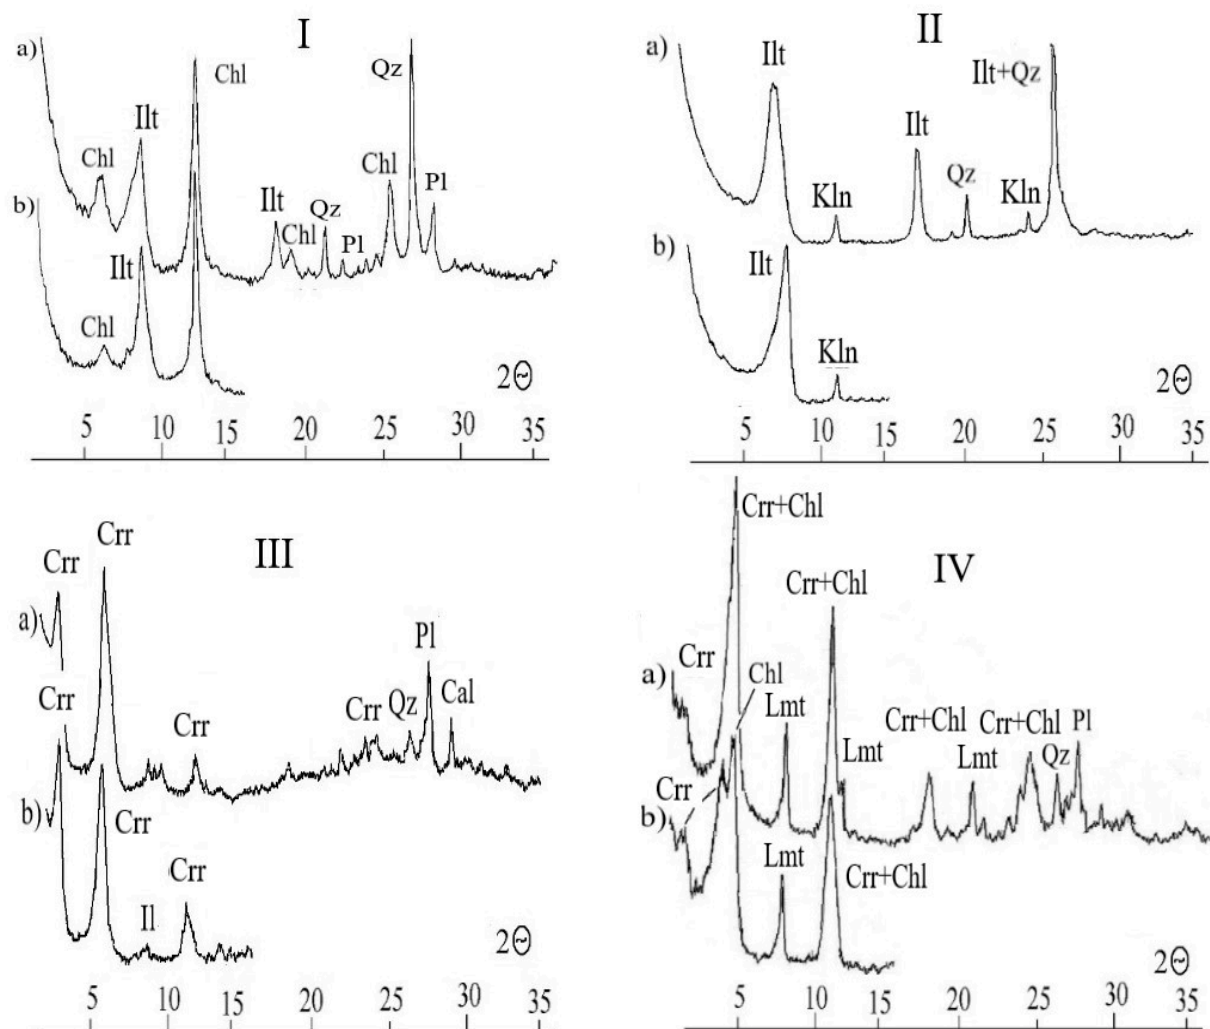

Figure S2: Oriented X-ray diffraction patterns of the main associations of clay and non-clay minerals in the Lower Cretaceous sedimentary rocks cement.

I – Illite and chlorite with quartz and plagioclase; II – Illite and kaolinite with quartz; III – Corrensite and illite with quartz, plagioclase and calcite; IV – Corrensite with chlorite, laumontite, quartz, and plagioclase. Letters: Ilt – illite; Chl – chlorite; Kln – kaolinite; Crr – corrensite; Lmt – laumontite; Cal – calcite; Qz – quartz; Pl – plagioclase [25,26]; a) – air-dried; b) – glycol-saturated.
