# Supplementary material
Source: MDPI journal article supplement (https://www.mdpi.com/2075-163X/12/7/909)
Supplement: s1 [file s1]

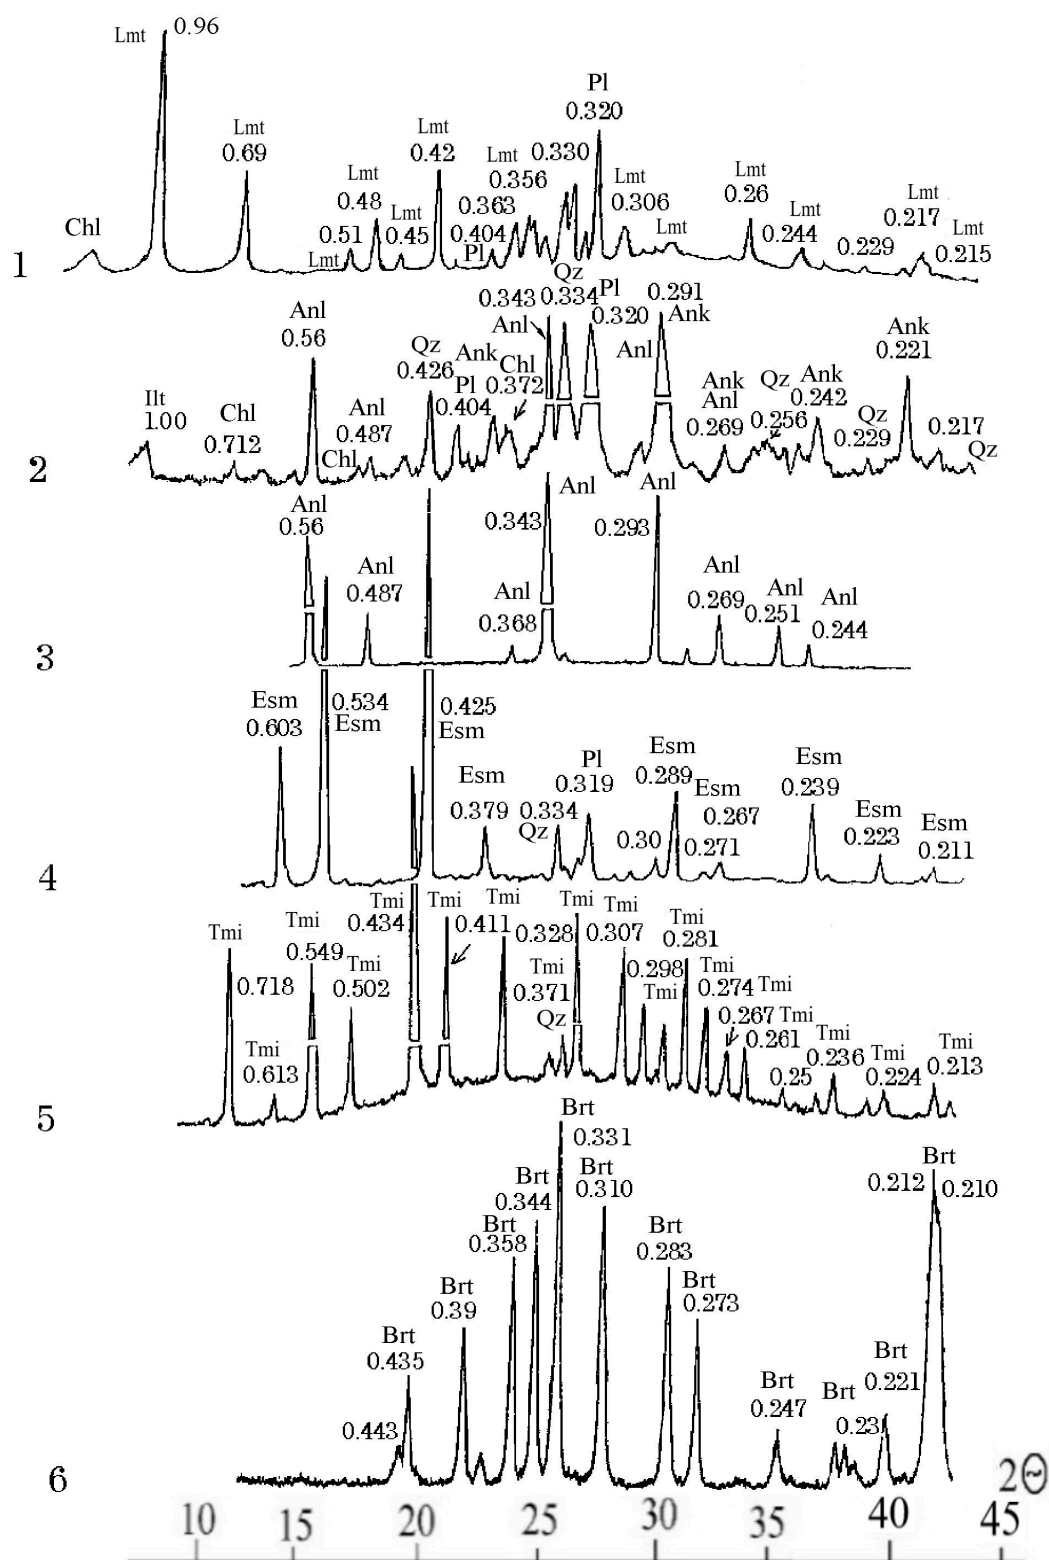

Figure S7: Powder X-ray diffraction patterns of minerals in the Lower Cretaceous sedimentary rocks of the Southern Yamato Ridge.

1 – laumontite (Lmt) with admixture of plagioclase (Pl) and quartz (Qz); 2 – ankerite (Ank), analcime (Anl), quartz (Qz), illite (Ill), and chlorite (Chl); 3 – analcime (Anl) with admixture of quartz (Qz); 4 – epsomite (Esm) with admixture of plagioclase (Pl) and quartz (Qz); 5 – tschermigite (Tmi); 6 – barite (Brt) [25,26]. Number represents diffraction peak in nm.
