# Supplementary material
Source: MDPI journal article supplement (https://www.mdpi.com/2075-163X/12/7/909)
Supplement: s1 [file s1]

Archive with 9 entries (9 files):
- Figure S1.pdf
- Figure S2.pdf
- Figure S3.pdf
- Figure S4.pdf
- Figure S5.pdf
- Figure S6.pdf
- Figure S7.pdf
- Figure S8.pdf
- Table S1.xls
