# Supplementary material
Source: MDPI journal article supplement (https://www.mdpi.com/2075-163X/12/7/909)
Supplement: s1 [file s1 › Table S1.xls]

## Sheet: Лист1
Table 1
Clay and non-clay minerals in Cretaceous rocks cement of the studied area
sample number	north latitude coordinates	coordinates of east longitude	illite	chlorite	kaolinite	swelling chlorite (NL)	rectorite	corrensite	chlorite-smectite	illite-smectite (R0)	smectite	stilbite	analcime	laumontite	calcite	ankerite	epsomite	barite	gypsum	goethite	cristobalite	quartz	plagioclase	remarks
1	2	3	4	5	6	7	8	9	10	11	12	13	14	15	16	17	18	19	20	21	22	23	24	25
Central part of Primorye
Kamenka Village (Dal'negorsk area, Upper Cretaceous, Primorskaya Series)
985	44º27'769	136º00'440	Х			Х			ХХ													ХХ	Х	tuff
986	44º27'769	136º00'440	ХХ						ХХ													ХХ	Х	tuff breccia
987	44º27'769	136º00'440	ХХ						ХХ													ХХ	Х	tuff breccia
988	44º27'740	136º00'379	ХХХ			Х																ХХ	Х	tuff andesite-dacite
989	44º27'660	136º00'266	ХХХ																			ХХ	Х	tuff breccia andesite-dacite
990	44º27'660	136º00'266	ХХХ			ХХ																ХХ	Х	tuff breccia andesite-dacite
991	44º25'918	135º56'710	ХХ						ХХ													ХХ	ХХ	tuff dacite
992	44º27'102	135º56'127	ХХХ			ХХ																ХХХ	ХХ	tuff andesite-dacite
993	44º26'638	135º53'953	ХХХ																			ХХХ	ХХ	tuff dacite
994	44º25'617	135º52'910	Х	ХХХ		Х																ХХХ	ХХ	tuff dacite
995	44º24'350	135º52'430	ХХХ	Х																		ХХХ	ХХ	andesite
996	44º24'350	135º52'430	ХХХ	Х																		ХХХ	Х	tuff breccia
997	44º24'329	135º51'099	ХХ	ХХХ					Х													ХХХ	ХХ	tuff wethered
998	44º24'155	135º49'948	ХХХ	Х					ХХ													ХХ	ХХ	tuff breccia andesite
999	44º22'100	135º49'025	ХХ	ХХ					ХХ													ХХХ	Х	andesite
Dal'negorsk area (Upper Cretaceous, Primorskaya Series)
858	44º34'283	135º37'700	ХХ	ХХ		Х	Х		Х	Х					Х							ХХ	Х	tuff gravelite
859	44º34'283	135º37'700	ХХХ	Х																		ХХХ	Х	f/g tuff sandstone wethered
860	44º34'283	135º37'700	Х	Х																		ХХХ	Х	tuff gravelite
861	44º34'283	135º37'700	ХХ	ХХ			Х		ХХ						ХХ							ХХ	ХХ	tuff sandstone unsorted
862	44º34'250	135º37'467	Х					ХХХ						X?								Х	Х	tuff gravelite
Upper Cretaceous, Primorskaya Series?
2	44º21'850	134º22'470	Х	Х?	XX	XX								X?	ХХ							ХХ	ХХ	aleuroargillite
1	44º21'851	134º22'471	Х	Х?	XX	ХХ								X?	ХХ							ХХХ	ХХ	c/g sandstone
Dal'negorsk District (Lower Cretaceous, Kemskaya Suite)
9	44º35'534	135º27'226	ХХХ	Х	ХХ		Х?															ХХХ		m/g sandstone
8	44º35'534	135º27'226	ХХХ	Х	ХХ																	ХХХ		m/g sandstone
7	44º35'534	135º27'226	ХХХ																			ХХХ		aleurolite
6	44º35'534	135º27'226	ХХ	ХХ	ХХ																	ХХХ		c/g sandstone
	District Krasnorechensk (Dal'negorsk area, Lower Cretaceous, Ust'kolumbiyskaya Suite)
890	44º36'399	135º15'589							Х	ХХ												ХХ	ХХ	dacite lava
891	44º36'423	135º15'680		Х					Х	ХХ												Х	Х	porphyrite
892	44º36'423	135º15'680	Х	Х				Х	ХХ	ХХ												ХХХ	ХХ	tuff breccia?
893	44º37'273	135º17'990	ХХ	ХХ																		ХХХ	ХХ	andesite
894	44º37'313	135º18'240	ХХ	ХХ					ХХ													ХХХ		m/g tuff sandstone
895	44º37'313	135º18'240	ХХ	ХХ					Х													ХХХ		m/g tuff sandstone
896	44º37'345	135º18'317	ХХ	ХХ					ХХ													ХХХ	Х	m/g tuff sandstone
897	44º37'414	135º18'417	ХХ	ХХ					Х													ХХХ	Х	m/g tuff sandstone
898	44º37'491	135º18'733	ХХХ						Х													ХХХ	Х	m/g tuff sandstone
899	44º37'514	135º18'827	ХХХ																			ХХХ	Х	m/g tuff sandstone
900	44º37'642	135º19'701	ХХ	ХХ																		ХХХ	Х	m/g tuff sandstone
901	44º37'649	135º22'291	ХХХ																			ХХХ	Х	m/g tuff sandstone
902	44º37'649	135º22'291	ХХ	ХХ					Х													ХХХ	Х	m/g tuff sandstone
903	44º37'624	135º22'459	ХХХ	Х																		ХХХ	Х	m/g tuff sandstone
904	44º37'598	135º22'772	ХХ	ХХ					Х													ХХ	Х	m/g tuff sandstone
905	44º37'571	135º22'953		ХХХ					Х													ХХХ	ХХ	andesite
Rudnaya Pristan' area (Lower Cretaceous, Taukhinskaya Suite)
280	44º20'941	135º49'022	ХХХ	Х						ХХ												ХХ	ХХ	effusive?
281	44º20'941	135º49'022	ХХХ							Х												ХХХ	Х	tuff lava layer lower part
282	44º20'941	135º49'022	ХХХ	ХХ					ХХ													ХХХ	Х	tuff lava layer upper part
283	44º21'966	135º45'097	ХХХ																			ХХХ		effusive?
284	44º21'966	135º45'097	ХХХ	Х																		ХХХ		effusive?
285	44º23'964	135º46'904	XX	XX																		XXX	X	tuff almond
286	44º23'966	135º46'906	XX	XX																		XXX	X	tuff aleuroargillite
287	44º23'991	135º46'896	XX	XX																		XX	XX	aleuroargillite
288	44º24'022	135º46'860	XX	XX																		XX	XX	f/g tuff sandstone
289	44º24'013	135º46'866	XX	XX																		XX	XX	c/g tuff sandstone
290	44º24'024	135º46'856	XX	XX					X													XX	XX	f/g tuff sandstone
291	44º24'038	135º46'838	X	XXX																		XX	XX	f/g tuff sandstone
292	44º24'043	135º46'833	XXX	X																		XXX	X	c/g tuff sandstone with wood remnants
293	44º24'047	135º46'824	XXX	X																		XXX	X	f/g tuff sandstone with wood remnants
294	44º24'054	135º46'817	XXX	X																		XX	XX	f/g tuff sandstone
295	44º24'061	135º46'808	X	XXX																		XX	XX	f/g tuff sandstone
296	44º24'072	135º46'796	XXX	X																		XXX	X	aleuroargillite
297	44º24'077	135º46'791	XXX	X																		XXX	X	aleuroargillite thin layered
Rudniy area (Kovalerovo District, Lower Cretaceous, Ust'kolumbiyskaya Suite)
828	44º22'407	134º37'414	XXX	X																		XXX	X	f/g sandstone with serpentine?
5	44º17'610	134º56'618	ХХ	ХХ																		ХХХ	ХХ	m/g sandstone
4	44º17'610	134º56'618	ХХ	ХХ			X															ХХХ	Х	m/g sandstone
3	44º17'610	134º56'618	ХХХ	Х										X?								ХХХ		m/g sandstone
Shumniy Village area (Lower Cretaceous, Svetlovodninskaya Suite)
317	44º20'746	134º41'566	XX	XX																		XX	XX	m/g sandstone
825	44º20'774	134º41'395	XX	XX		XX																XXX	X	m/g tuff sandstone with wood remnants
826	44º21'304	134º40'450	XX	X																		XXX	X	m/g sandstone
Shumniy Village area (Lower Cretaceous, Divninskaya Suite)
824	44º17'532	134º48'580	XXX	X			X															XXX	X	effusive?
Shumniy Village area (Lower Cretaceous, Klyuchevskaya Suite)
827	44º22'125	134º39'083	XXX	X																		XXX	X	tuff aleuroargillite
829	44º22'811	134º33'490	XX	XX																		XXX	X	hornfelsed shale
Underwater Yamato Upland (Japan Sea)
North Yamato Ridge (Lower Cretaceous)																									Underwater upland North Yamato (Japan Sea)
1192/1					ХХ		ХХ				Х											Х	Х	c/g sandstone	1192/1					ХХ		ХХ				Х											Х	Х	c/g sandstone
1192/6			Х				ХХХ				Х											Х		c/g sandstone	1192/6			Х				ХХХ				Х											Х		c/g sandstone
1193/k				Х	Х		ХХ	ХХ														Х	Х	c/g sandstone	1193/k				Х	Х		ХХ	ХХ														Х	Х	c/g sandstone
1193/2k					ХХ		ХХ															Х	Х	c/g sandstone	1193/2k					ХХ		ХХ															Х	Х	c/g sandstone
1410																				XXX		X	X	goethite	1410																				XXX		X	X	goethite
1411																				XXX				goethite	1411																				XXX				goethite
1411/10																				XXX		X		goethite	1411/10																				XXX		X		goethite
1411/mk			Х		ХХХ						Х											Х	Х	c/g sandstone	1411/mk			Х		ХХХ						Х											Х	Х	c/g sandstone
South Yamato Ridge (Lower Cretaceous)																									Underwater upland South Yamato (Japan Sea)
1430														XXX										parefilling	1430														XXX										parefilling
1430a																		XXX						thin crusts	1430a																		XXX						thin crusts
1430/k			XX					XXX					XX									X	X	m/g sandstone	1430/k			XX					XXX					XX									X	X	m/g sandstone
1437/4								XXX					Х									Х	Х	m/g sandstone	1437/4								XXX					Х									Х	Х	m/g sandstone
1441			ХХ	XX											XX	ХХ						Х	Х	f/g sandstone	1441			ХХ	XX											XX	ХХ						Х	Х	f/g sandstone
1441a			ХХ										ХХ									Х	Х	m/g sandstone	1441a			ХХ										ХХ									Х	Х	m/g sandstone
1441b			ХХ										ХХ			ХХ						Х	Х	f/g sandstone	1441b			ХХ										ХХ			ХХ						Х	Х	f/g sandstone
1441d			ХХ										ХХ									Х	Х	m/g sandstone	1441d			ХХ										ХХ									Х	Х	m/g sandstone
1441e					X		XX															Х	Х	c/g sandstone	1441e					X		XX															Х	Х	c/g sandstone
1441/b1																ХХХ						Х		f/g sandstone	1441/b1																ХХХ						Х		f/g sandstone
1441/b2			ХХ		X								ХХ						X			Х	Х	m/g sandstone	1441/b2			ХХ		X								ХХ						X			Х	Х	m/g sandstone
1441/2													ХХХ						X			Х		m/g sandstone	1441/2													ХХХ						X			Х		m/g sandstone
1441/2a																		XX						m/g sandstone	1441/2a																		XX						m/g sandstone
1441/2b												XXX												m/g sandstone	1441/2b												XXX												m/g sandstone
1441/2c												XX				ХХХ	XX							m/g sandstone	1441/2c												XX				ХХХ	XX							m/g sandstone
1441/3																						ХХ	ХХ	m/g sandstone	1441/3																						ХХ	ХХ	m/g sandstone
1832/1			ХХ				ХХХ				Х											Х	Х	c/g sandstone	1832/1			ХХ				ХХХ				Х											Х	Х	c/g sandstone
1832/2			ХХ				ХХ	ХХХ														Х	Х	c/g sandstone	1832/2			ХХ				ХХ	ХХХ														Х	Х	c/g sandstone
1832/3			ХХХ				ХХ	ХХ														Х	Х	c/g sandstone	1832/3			ХХХ				ХХ	ХХ														Х	Х	c/g sandstone
1832/3b			ХХХ				ХХ	ХХ														Х	Х	c/g sandstone	1832/3b			ХХХ				ХХ	ХХ														Х	Х	c/g sandstone
1833/1a			ХХ		ХХХ						Х											Х	Х	c/g sandstone	1833/1a			ХХ		ХХХ						Х											Х	Х	c/g sandstone
1834/1			ХХ				ХХХ				Х		ХХ									Х	Х	c/g sandstone	1834/1			ХХ				ХХХ				Х		ХХ									Х	Х	c/g sandstone
1834/2							ХХХ				ХХ						X				XX			c/g sandstone	1834/2							ХХХ				ХХ						X				XX			c/g sandstone
1834/2b			ХХХ				ХХ															Х	Х	c/g sandstone	1834/2b			ХХХ				ХХ															Х	Х	c/g sandstone
1834/1g			ХХХ				ХХ						Х									Х	Х	c/g sandstone	1834/1g			ХХХ				ХХ						Х									Х	Х	c/g sandstone
1834/b			ХХ		ХХХ		ХХ				Х											Х	Х	m/g sandstone	1834/b			ХХ		ХХХ		ХХ				Х											Х	Х	m/g sandstone
1834/be			ХХХ				ХХ															Х	Х	m/g sandstone	1834/be			ХХХ				ХХ															Х	Х	m/g sandstone
1834/d			ХХ				ХХХ				Х		ХХ									Х		m/g sandstone	1834/d			ХХ				ХХХ				Х		ХХ									Х		m/g sandstone
1834/c			ХХХ				ХХ						ХХ									Х	Х	m/g sandstone	1834/c			ХХХ				ХХ						ХХ									Х	Х	m/g sandstone
1834/1c			ХХХ				ХХ	ХХ														Х	Х	c/g sandstone	1834/1c			ХХХ				ХХ	ХХ														Х	Х	c/g sandstone
1834/6			ХХ				ХХ															Х	Х	c/g sandstone	1834/6			ХХ				ХХ															Х	Х	c/g sandstone
1834/22			ХХ		ХХХ		ХХ				Х		Х									Х	Х	c/g sandstone	1834/22			ХХ		ХХХ		ХХ				Х		Х									Х	Х	c/g sandstone
Terpeniya Peninsula (Sakhalin Island)
Uchirskaya Suite (Upper Cretaceous)
210а				Х					ХХХ				ХХ											tuff sandstone
210b			Х						ХХХ				ХХ											tuff sandstone
213			Х						ХХХ				ХХ											agglomerate tuff
227															ХХХ									shells of inoceram
227												ХХХ	Х?									ХХ	ХХ	siliceous aleuroargillite
233							Х					Х										ХХ	Х	siliceous aleuroargillite
235			ХХ	ХХ		Х	ХXX					ХХ										Х	Х	siliceous aleuroargillite
237а			ХХ	ХХ			ХXX					ХХ										Х	Х	siliceous aleuroargillite
237r			Х	Х			XX					ХХХ										Х	Х	layer with radiolariya
237t				Х		Х						ХХХ			Х									tuff layer
250			Х?	Х?			ХХ?					ХХ										Х	Х	siliceous aleuroargillite
Shikotan Island
Malokuril'skaya Suite (Upper Cretaceous)
52sh			Х				ХХ		Х?	ХХ		ХХ										ХХХ	Х
53sh							Х?		Х?	ХХ?		Х										ХХХ	Х	tuff layer
53ash			Х	Х			Х?		Х?	ХХ?	ХХ	ХХ										ХХХ	ХХ	aleurolite?
54sh			Х				Х?		Х?	Х?	ХХ?	Х										ХХХ	Х	tuff sandstone?
55sh			Х				Х?		Х?	Х?	ХХ?	Х										ХХХ	Х	tuff sandstone?
57sh			ХХ							Х		Х										ХХХ	Х	glaukonite rock
66sh											Х?				Х							ХХХ		tuff sandstone?
69sh							Х?		ХХХ			Х											ХХ	tuff sandstone?
70sh			ХХ				ХХ?		Х			ХХ										ХХ	Х	green aleurolite
75sh							Х?		ХХХ			ХХ	ХХХ									Х	Х
77sh			Х				ХХ?		ХХХ						Х							Х	Х
83sh												ХХХ										Х	ХХХ	sandstone (ooid)
85sh			Х								Х?	Х										ХХХ		sherts" with tuff layer
86sh			Х							ХХ	ХХ	ХХ										ХХ	Х	green aleurolite
87sh			ХХ				ХХ?		Х			ХХ										ХХ	Х	alevrolite?
88sh			Х							ХХ	ХХ	ХХ										ХХ	Х	alevrolite?
89sh			ХХ							ХХ?		ХХ										ХХ	Х	alevrolite?
90sh			Х							ХХХ		ХХ										ХХХ	ХХ	alevrolite?
91sh			Х							ХХ	ХХ	ХХ										ХХХ	Х	alevrolite?
92sh			Х						ХХХ			ХХ										Х	Х	alevrolite?
93sh			Х							ХХ	ХХ	ХХ			Х?							ХХ	Х	alevrolite?
94sh			Х						ХХХ			Х			Х?							ХХ	Х	alevrolite?
95sh			Х				ХХ		Х?	ХХ?		ХХ			Х?							ХХХ	Х	alevrolite?
96sh			Х				Х?		Х?	ХХ?		ХХ			Х							ХХХ	Х	green aleurolite
96sh			Х				ХХ			Х?		Х										ХХХ		green aleurolite
97sh			Х				ХХ		Х?	ХХ?		ХХ										ХХХ	Х	green aleurolite
98sh			ХХ				Х?		Х?	ХХ?		ХХ										ХХ	ХХ	tuff sandstone
98sh			Х?	Х			Х?		Х?			Х										ХХХ	Х	tuff sandstone
99sh			Х				ХХ		Х?	ХХ?		ХХ										ХХХ	ХХ	green aleurolite
101sh									ХХХ			Х										Х	ХХ	ferrigous layer
102sh							Х?		Х?			Х										Х	Х	mineralized layer
103sh												Х										ХХХ	ХХ	tuff aleurolite layer
103sh												Х			Х							ХХХ	ХХ	tuff aleurolite layer
103sh										ХХ	ХХ	ХХ										ХХХ	Х	radiolaria
114sh						ХХ?	Х?		ХХХ			ХХХ			ХХ							ХХХ	ХХ	aleurolite with radiolaria
115sh												ХХ			ХХХ							ХХ		aleurolite with radiolaria
116sh			Х	Х		ХХ?	Х?		ХХХ			ХХ			Х							ХХХ	ХХ	aleurosandstone
122sh			Х	Х		ХХ?	ХХХ		Х?
123sh			Х				Х?		ХХХ			ХХХ			Х?							ХХХ	Х	aleurosandstone with inoceram
Matakotanskaya Suite (Upper Cretaceous)
7sh													ХХХ											tuff
7крsh												ХХХ												tuff
8sh			X			X?						ХХ	ХХХ											tuff sandstone
75sh												ХХ	ХХХ											tuff
77sh												ХХ			X							X	XX	tuff
122sh													ХХ											tuff
Krabozavodskaya Suite (Lower-Upper Cretaceous)
104sh															ХХХ							ХХ		calcareous nodule
106sh							Х?		ХХХ													Х	ХХХ	lava pillow
107sh							Х?		Х?													ХХХ	ХХ	inclusion in lava pillow
108sh			ХХХ																			ХХХ	Х	cement
109sh			ХХХ																			Х		shert
110sh			ХХХ				ХХ		Х?			X										ХХХ	ХХ	shert
111sh							ХХХ		Х?						ХХХ							ХХХ		inclusion in lava pillow
Vityaz Ridge																									Vityaz Ridge
Upper Cretaceous (Maastrichtian-Danian)																									Upper Cretaceous (Maastrichtian-Danian)
LV37_14-8			ХХ	ХХ			ХХ	ХХ														ХХХ	ХХ	aleuroargillite	LV37_14-8			ХХ	ХХ			ХХ	ХХ														ХХХ	ХХ	aleuroargillite
LV37_14-5a				Х		Х?		ХХ				ХХ										ХХХ		aleuroargillite	LV37_14-5a				Х		Х?		ХХ				ХХ										ХХХ		aleuroargillite
LV37_14-5b			Х	Х		ХХ?		ХХ?														ХХХ	Х	aleuroargillite	LV37_14-5b			Х	Х		ХХ?		ХХ?														ХХХ	Х	aleuroargillite
LV37_20-8			Х					ХХХ														ХХ	ХХ	sandstone	LV37_20-8			Х					ХХХ														ХХ	ХХ	sandstone
LV37_20-14			ХХ	ХХ			Х?	ХХХ														ХХХ	Х	aleurolite	LV37_20-14			ХХ	ХХ			Х?	ХХХ														ХХХ	Х	aleurolite
LV37_23-1			Х	ХХ			Х?	ХХ?														ХХХ	Х	f/g sandstone	LV37_23-1			Х	ХХ			Х?	ХХ?														ХХХ	Х	f/g sandstone
LV37_23-2			Х	ХХХ				ХХ														ХХХ	Х	f/g sandstone	LV37_23-2			Х	ХХХ				ХХ														ХХХ	Х	f/g sandstone
LV37_23-4			ХХ	ХХ			Х?	ХХ?														ХХХ	Х	f/g sandstone	LV37_23-4			ХХ	ХХ			Х?	ХХ?														ХХХ	Х	f/g sandstone
LV37_25-3			ХХХ	ХХ																		ХХХ	ХХ	hornfels	LV37_25-3			ХХХ	ХХ																		ХХХ	ХХ	hornfels
LV41_13-1								ХХХ														Х	Х	f/g sandstone	LV41_13-1								ХХХ														Х	Х	f/g sandstone
LV41_15			Х	Х				ХХХ														Х	ХХ	f/g sandstone	LV41_15			Х	Х				ХХХ														Х	ХХ	f/g sandstone
LV41_15_б				Х				ХХХ														Х	Х	f/g sandstone	LV41_15_б				Х				ХХХ														Х	Х	f/g sandstone
LV41_15_1			Х	ХХХ				ХХ					Х									ХХХ	Х	f/g sandstone	LV41_15_1			Х	ХХХ				ХХ					Х									ХХХ	Х	f/g sandstone
LV41_15_3			Х	Х				ХХХ														ХХХ		f/g sandstone	LV41_15_3			Х	Х				ХХХ														ХХХ		f/g sandstone
LV41_15_7			ХХ	ХХ				ХХХ														ХХ	Х	f/g sandstone	LV41_15_7			ХХ	ХХ				ХХХ														ХХ	Х	f/g sandstone
LV41_16			Х	Х				ХХХ															Х	f/g sandstone	LV41_16			Х	Х				ХХХ															Х	f/g sandstone
LV41_16_2			Х	Х					ХХХ													ХХХ	Х	aleurolite	LV41_16_2			Х	Х					ХХХ													ХХХ	Х	aleurolite
LV41_16_4								ХХХ	Х													Х	Х	aleurolite	LV41_16_4								ХХХ	Х													Х	Х	aleurolite
LV41_19			ХХ	ХХ			ХХ	ХХХ														ХХХ	ХХ	aleurolite	LV41_19			ХХ	ХХ			ХХ	ХХХ														ХХХ	ХХ	aleurolite
LV41_19_1а			ХХ	ХХХ			ХХ															ХХХ	ХХ	aleurolite	LV41_19_1а			ХХ	ХХХ			ХХ															ХХХ	ХХ	aleurolite
LV41_19_4			ХХ	ХХ			ХХХ															ХХХ	ХХ	aleurolite	LV41_19_4			ХХ	ХХ			ХХХ															ХХХ	ХХ	aleurolite
LV41_19-1p				ХХ				ХХ														Х	ХХ	c/g sandstone	LV41_19-1p				ХХ				ХХ														Х	ХХ	c/g sandstone
LV41_22				ХХХ			ХХ	ХХ														ХХХ	ХХ	aleuroargillite	LV41_22				ХХХ			ХХ	ХХ														ХХХ	ХХ	aleuroargillite
LV41_22a			ХХ	ХХХ			ХХ															ХХХ	ХХ	aleuroargillite	LV41_22a			ХХ	ХХХ			ХХ															ХХХ	ХХ	aleuroargillite
Western Kamchatka
Palana Section (Upper Cretaceous)
70			XX	XX					X			XX										XXX	X	aleuroargillite?
83a			X	X								XX										XXX	X	aleuroargillite?
83b			X	XXX								XX										XXX	X	aleuroargillite?
84a			XX	XX								XX										XXX	X	aleuroargillite?
84b			X	X					X	XX					XXX							X	X	aleuroargillite?
84g			X	X											XXX							X	X	aleuroargillite?
87a			X	X								XX										XXX		aleuroargillite?
87b			X	X								XX										XXX		aleuroargillite?
87d			XX	XX								XX										XXX	X	aleuroargillite?
87e			X	X								XX										XXX	X	aleuroargillite?
Note: c/g – coarse grained sandstone; m/g – middle grained sandstone; f/g – fine grained sandstone;
ХХХ – dominated; ХХ – presented in mixture; Х – trace amounts. NL – not listed [25,26]
[truncated: 99 more columns]
