# Supplementary material
Source: MDPI journal article supplement (https://www.mdpi.com/2075-163X/12/7/909)

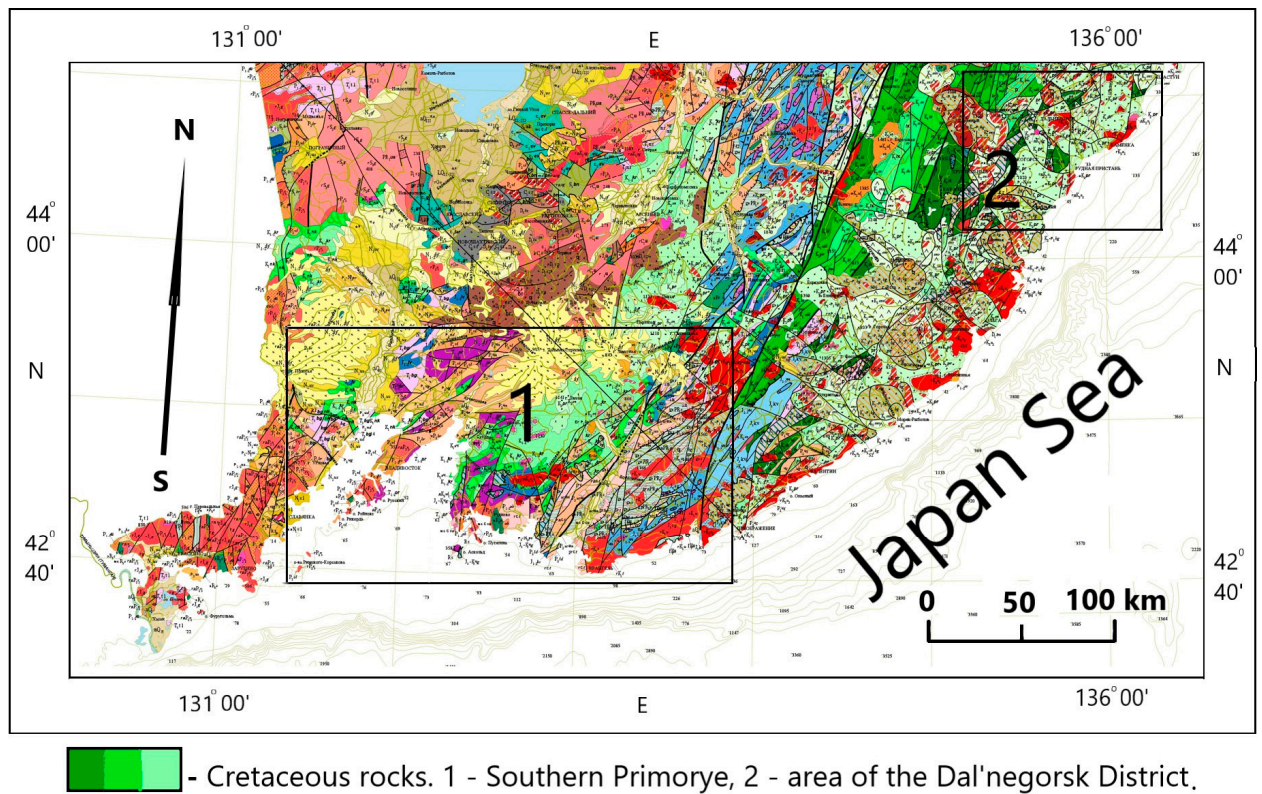

Figure S1: Geological map of the central part of Primorye Region [8].

Supplement: s1 [file s1]
